# Supplementary material for: Saponin from sea cucumber exhibited more significant effects than ginsenoside on ameliorating high fat diet-induced obesity in C57BL/6 mice
Source: Royal Society of Chemistry journal article supplement (doi:10.1039/c7md00653e), 2018-01-01
Supplement: c7md00653e1.pdf [file c7md00653e1.pdf]

Table S1. Compositions of Experimental Diets

| <b>Ingredients(g/kg)</b>            | <b>LF</b> | <b>HF</b> | <b>0.02%SSC</b> | <b>0.08%SSC</b> | <b>0.02%SG</b> | <b>0.08%SG</b> |
|-------------------------------------|-----------|-----------|-----------------|-----------------|----------------|----------------|
| <b>Casein</b>                       | 200       | 200       | 200             | 200             | 200            | 200            |
| <b>Cornstarch</b>                   | 650       | 250       | 249.7           | 249             | 249.7          | 249            |
| <b>Sucrose</b>                      | 0         | 200       | 200             | 200             | 200            | 200            |
| <b>Corn oil</b>                     | 50        | 50        | 50              | 50              | 50             | 50             |
| <b>Lard</b>                         | 0         | 200       | 200             | 200             | 200            | 200            |
| <b>Mineral mix <sup>a</sup></b>     | 35        | 35        | 35              | 35              | 35             | 35             |
| <b>Vitamin mix <sup>b</sup></b>     | 10        | 10        | 10              | 10              | 10             | 10             |
| <b>Cellulose</b>                    | 5         | 5         | 5               | 5               | 5              | 5              |
| <b>Choline bitartrate</b>           | 3         | 3         | 3               | 3               | 3              | 3              |
| <b>DL-methionine</b>                | 2         | 2         | 2               | 2               | 2              | 2              |
| <b>SSC</b>                          | --        | --        | 0.25            | 1               | --             | --             |
| <b>SG</b>                           | --        | --        | --              | --              | 0.25           | 1              |
| <b>Energy (kcal/g) <sup>c</sup></b> | 3.85      | 4.85      | 4.85            | 4.85            | 4.85           | 4.85           |

<sup>a</sup> AIN-93G mineral mix.

<sup>b</sup> AIN-93G vitamin mix.

<sup>c</sup> Food energy = 4×amount of carbohydrate + 4×amount of protein +9×amount of fat. Energy density of carbohydrate, protein, and fat are 4, 4, and 9 kcal/g, respectively.

LF, low-fat diet; HF, high-fat diet; SSC, saponins of sea cucumber; 0.02%SSC, high-fat diet plus 0.02% SSC; 0.08% SSC, high-fat diet plus 0.08% SSC r; 0.02%SG, high-fat diet plus 0.02% SG; 0.08% SG, high-fat diet plus 0.08% SG

Table S2. Primers used in this study

| Gene           | Forward primer          | Reverse primer          |
|----------------|-------------------------|-------------------------|
| FAS            | TTGATGATTCAGGGAGTGGA    | AGCAGATGAGTTGTTCTTGGAC  |
| SCD-1          | CCACTCGCCTACACCAACG     | GGGGTCCCTCCTCATCCT      |
| SREBP1-c       | AACCTCATCCGCCACCTG      | TGGTAGACAACAGCCGCATC    |
| PPAR- $\alpha$ | GTCACA CAATGCAATTCGCTTT | TTTGCTTTTTTCAGATCTTGGCA |
| PGC-1 $\alpha$ | AGGTCCCCAGGCAGTAGAT     | GAGCAGCGAAAGCGTCAC      |
| SIRT1          | GTCTCCTGTGGGATTCCTGA    | ACACAGAGACGGCTGGA ACT   |
| AdipoR1        | ACGTTGGAGAGTCATCCCGTAT  | CTCTGTGTGGATGCGGAAGAT   |
| GCK            | CCCTGAGTGGCTTACAGTTC    | ACGGATGTGAGTGTTGAAGC    |
| $\beta$ -actin | CAGGCATTGCTGACAGGATG    | TGCTGATCCACATCTGCTGG    |
